# Supplementary material
Source: Elsevier journal article supplement (https://www.sciencedirect.com/science/article/pii/S2173511517301562)
Supplement: mmc1 [file S2173511517301562:mmc1.docx]

Prognostic Factors in Patients Hospitalised for Community-Acquired Pneumonia

Fatma Tokgoz Akyil1, Murat Yalcinsoy2, Armagan Hazar1, Aykut Cilli3, 'Oznur Kilic' 4, Abdullah Sayiner5, Nurdan Kokturk6, Aysin Sakar Coskun7, Ayten Filiz8, Ebru Cakir Edis9

1: Sureyyapasa Chest Diseases and Thoracic Surgery Training and Research Hospital, Department of Chest Diseases

2: Inonu University, Faculty of Medicine, Department of Chest Diseases

3: Akdeniz University, Faculty of Medicine, Department of Chest Diseases

4: Dokuz Eylul University, Faculty of Medicine, Department of Chest Diseases

5: Ege University, Faculty of Medicine, Department of Chest Diseases

6: Gazi University, Faculty of Medicine, Department of Chest Diseases

7: Celal Bayar University, Faculty of Medicine, Department of Chest Diseases

8: Gaziantep University, Faculty of Medicine, Department of Chest Diseases

9: Trakya University, Faculty of Medicine, Department of Chest Diseases

Corresponding Author:

Fatma Tokgoz Akyil, Sureyyapasa Chest Diseases and Thoracic Surgery Training and Research Hospital, Department of Chest Diseases

Address: Sureyyapasa Gogus Hastalikları ve Gogus Cerrahisi Egitim ve Arastirma Hastanesi, C Blok, Kat:4 Maltepe/Istanbul, Turkiye

Mail: [fatmatokgoz86@gmail.com](mailto:fatmatokgoz86@gmail.com)

Phone Number: +90 2164214200
